# Supplementary material
Source: HighWire-hosted journal article supplement (https://srh.bmj.com/content/45/2/95)
Supplement: inline-supplementary-material-2 [file inline-supplementary-material-2.docx]

| **Supporting Table 2. Legal exceptions to gestational age-limit by country, 2017** | | |
| --- | --- | --- |
| **Country** | **Gestational-age limit** | **Gestational-age exceptions** |
|
| Belgium | Through 14th week | No gestational limit specified for cases of fetal impairment |
| Canada | Law does not indicate gestational-age limit | n/a |
| Czech Republic | Through 12th week | Exception up to 24 weeks for cases of fetal impairment or rape |
| Denmark | Through 12th week | No gestational limit specified for cases of fetal impairment, risk to life or health including bodily or mental suffering, or young age |
| Estonia | Through 12th week | Exception up to 22 weeks for cases of fetal impairment, or intellectual or cognitive disability |
| Finland | Through 12th week | No gestational limit specified for cases of fetal impairment; Exception up to 20 weeks for those less than 17 years of age, or risk to life or health |
| France | Through 14th week | No gestational age limit specified for cases of fetal impairment |
| Germany | Through 14th week | No gestational age limit specified if risk to mental and physical health |
| Great Britain | Through 24th week | No gestational limit specified for cases of fetal impairment, risk to life or permanent injury to physical or mental health |
| Iceland | Through 12th week | No gestational age limit specified for cases of fetal impairment, rape, intellectual or cognitive disability, or risk to mental or physical health |
| Israel | Through 12th week | No explicit reference to exceptions in the law |
| Italy | Through 90 days/three months | No gestational age limit specified for cases of fetal impairment or risk to physical or psychological health |
| Japan | Through 12th week | Exception up to 21 weeks for risk to physical health, rape, or economic or social reasons |
| Netherlands | No gestational-age limit for previability abortion | n/a |
| New Zealand | Through 12th week | No gestational limit specified if affecting mental health or physical health; Exception up to 20 weeks for cases of fetal impairment, incest or intellectual or cognitive disability |
| Norway | Through 12th week | Exception up to 22 weeks for cases of fetal impairment, or risk of life or health |
| Portugal | Through 10th week | Exception up to 24 week limit for cases of fetal impairment |
| Singapore | Through 24th week | Exception after 24 weeks if risk to physical or mental health |
| Slovakia | Through 12th week | Exception up to six months for cases of fetal impairment, rape or incest |
| Slovenia | Through 12th week | No explicit reference in law to exceptions |
| Spain | Through 14th week | Exception up to 22 weeks limit for cases of fetal impairment (or no gestational limit depending on the circumstance) |
| Sweden | Through 18th week | No explicit reference in law to exceptions |
| Switzerland | Through 12th week | No gestational limit specified if risk to health or causing state of deep distress |
| United States of America | No gestational-age limit for previability abortion | n/a |
| Source: Center for Reproductive Rights for gestational age-limit; Global Abortion Policies Database and country's legal documents for exceptions | | |
