# Supplementary material
Source: HighWire-hosted journal article supplement (https://srh.bmj.com/content/45/2/95)
Supplement: inline-supplementary-material-3 [file inline-supplementary-material-3.docx]

| Supporting Table 3. Most recent year of available data |
| --- |
| *2011* |
| Belgium |
| *2012* |
| Singapore |
| *2013* |
| Israel |
| *2014* |
| United States |
| *2015* |
| Denmark |
| *2016* |
| Canada, Czech Republic, Iceland*, Italy, Japan, Netherlands, Portugal, Slovenia, Spain |
| *2017* |
| Estonia, Finland, France, Germany, Great Britain, New Zealand, Norway, Slovakia, Sweden, Switzerland |
| *Method data for Iceland is from 2015 |
