# Supplementary material
Source: HighWire-hosted journal article supplement (https://srh.bmj.com/content/45/2/95)
Supplement: inline-supplementary-material-5 [file inline-supplementary-material-5.docx]

| Supporting Table 4. Percent distribution of abortions fewer than 12 weeks by gestational age and method, 2017 | | | | |
| --- | --- | --- | --- | --- |
| **Country** | **Gestation** | **Method** | | |
| *Surgical* | *Medical* | *Total* |
| **%** | |  |
| England & Wales | < 9 weeks | 17 | 83 | 100 |
| 9-12 weeks | 71 | 29 | 100 |
| Norway | < 9 weeks | 9 | 91 | 100 |
| 9-12 weeks | 32 | 68 | 100 |
| Sweden | < 9 weeks | 5 | 95 | 100 |
| 9-12 weeks | 22 | 78 | 100 |
